# Supplementary material
Source: HighWire-hosted journal article supplement (https://ijgc.bmj.com/content/33/6/853)
Supplement: inline-supplementary-material-2 [file inline-supplementary-material-2.pdf]

## LEGENDS FOR SUPPLEMENTAL MATERIAL

**Table S1.** Patients' characteristics and predictive factors of sentinel lymph node failed mapping.

-: not available; **BMI:** body mass index; **FIGO:** International Federation of Gynecology and Obstetrics; **LVSI:** lymph-vascular space invasion; **LN:** lymph node

**Table S2.** Characteristics of included studies.

**Table S3.** Details about sentinel lymph node biopsy.

-: not available; **ICG:** Indocyanine Green; **H&E:** Hematoxylin and eosin stain; **IHC:** immunohistochemistry; **SLN:** Sentinel lymph node

**Figure S1.** Flow diagram of studies identified in the systematic review (Prisma template [Preferred Reporting Item for Systematic Reviews and Meta-analyses]).

**Figure S2.** Assessment of risk of bias. **a)** Summary of risk of bias for each study; Plus sign: low risk of bias; minus sign: high risk of bias; question mark: unclear risk of bias. **b)** Risk of bias graph about each risk of bias item presented as percentages across all included studies.

**Figure S3.** Forest plot of individual studies and pooled odds ratios with 95% confidence intervals assessing the associations between sentinel lymph node failed mapping and BMI>30 kg/m<sup>2</sup>.

**Figure S4.** Forest plot of individual studies and pooled odds ratios with 95% confidence intervals assessing the associations between sentinel lymph node failed mapping and menopausal status.

**Figure S5.** Forest plot of individual studies and pooled odds ratios with 95% confidence intervals assessing the associations between sentinel lymph node failed mapping and adenomyosis.

**Figure S6.** Forest plot of individual studies and pooled odds ratios with 95% confidence intervals assessing the associations between sentinel lymph node failed mapping and prior pelvic surgery.

**Figure S7.** Forest plot of individual studies and pooled odds ratios with 95% confidence intervals assessing the associations between sentinel lymph node failed mapping and prior cervical surgery.

**Figure S8.** Forest plot of individual studies and pooled odds ratios with 95% confidence intervals assessing the associations between sentinel lymph node failed mapping and prior cesarian section.

**Figure S9.** Forest plot of individual studies and pooled odds ratios with 95% confidence intervals assessing the associations between sentinel lymph node failed mapping and lysis of adhesions during surgery before sentinel lymph node biopsy.

**Figure S10.** Forest plot of individual studies and pooled odds ratios with 95% confidence intervals assessing the associations between sentinel lymph node failed mapping and deep myometrial invasion.

**Figure S11.** Forest plot of individual studies and pooled odds ratios with 95% confidence intervals assessing the associations between sentinel lymph node failed mapping and FIGO grade 3.

**Figure S12.** Forest plot of individual studies and pooled odds ratios with 95% confidence intervals assessing the associations between sentinel lymph node failed mapping and non-endometrioid histotype.

**Figure S13.** Forest plot of individual studies and pooled odds ratios with 95% confidence intervals assessing the associations between sentinel lymph node failed mapping and lymph-vascular space invasion.
