# Supplementary material
Source: HighWire-hosted journal article supplement (https://ijgc.bmj.com/content/33/6/853)
Supplement: inline-supplementary-material-3 [file inline-supplementary-material-3.pdf]

**Table S1.** Characteristics of included studies.

| <b>Study</b>                | <b>Setting</b>                                                                                                                                                                      | <b>Study design</b>                    | <b>Study period</b> | <b>Sample size</b> |
|-----------------------------|-------------------------------------------------------------------------------------------------------------------------------------------------------------------------------------|----------------------------------------|---------------------|--------------------|
| <b>2020 Sozzi [19]</b>      | Fondazione Policlinico Universitario A. Gemelli IRCCS, Università Cattolica del Sacro Cuore of Rome, Italy; Ospedale degli Infermi, Biella, Italy University of Parma, Parma, Italy | Multicentre retrospective cohort study | Jan 2016 - Jul 2019 | 376                |
| <b>2019 Ianieri [16]</b>    | IRCCS "Sacro Cuore" Hospital, Negrar, Verona, Italy; "Regina Montis Regalis" Hospital, Mondovi, Italy                                                                               | Multicentre prospective cohort study   | Jun 2017 – Jun 2018 | 110                |
| <b>2019 Taskin [11]</b>     | Ankara University School of Medicine, Ankara, Turkey                                                                                                                                | Prospective cohort study               | Apr 2017 – Oct 2018 | 101                |
| <b>2019 Tortorella [17]</b> | Mayo Clinic, Rochester, Minnesota, USA                                                                                                                                              | Retrospective cohort study             | Jun 2014 – Jun 2014 | 327                |
| <b>2018 Body [15]</b>       | Hotel-Dieu de Québec Hospital, Laval University, Quebec City, Canada                                                                                                                | Retrospective cohort study             | Feb 2014 – Dec 2015 | 119                |
| <b>2016 Eriksson [14]</b>   | Memorial Sloan Kettering Cancer Center, New York, USA                                                                                                                               | Retrospective cohort study             | Jan 2011 – Dec 2013 | 312                |
| <b>Total</b>                | -                                                                                                                                                                                   | -                                      | -                   | <b>1345</b>        |
