# Supplementary material
Source: HighWire-hosted journal article supplement (https://ijgc.bmj.com/content/33/6/853)
Supplement: inline-supplementary-material-4 [file inline-supplementary-material-4.pdf]

**Table S2.** Patients' characteristics and predictive factors of sentinel lymph node failed mapping

| Study                | Age<br>(Mean ± SD<br>or median),<br>[years +] | BMI<br>(Mean ± SD or<br>median),<br>[Kg/m <sup>2</sup> ] | Menopausal<br>status<br>n (%) | Adenomy-<br>osis<br>n (%) | Prior<br>pelvic<br>surgery<br>n (%) | Prior<br>cervical<br>surgery<br>n (%) | Prior<br>cesarian<br>section<br>n (%) | Lysis of<br>adhesions<br>n (%) | Deep<br>myometrial<br>invasion<br>n (%) | FIGO<br>grade 3<br>n (%) | FIGO<br>stage III-IV<br>n (%) | Non-<br>endometrioid<br>histotype<br>n (%) | LVSI<br>n (%)     | Enlarged<br>LN<br>n (%) | LN<br>involvement<br>n (%) |
|----------------------|-----------------------------------------------|----------------------------------------------------------|-------------------------------|---------------------------|-------------------------------------|---------------------------------------|---------------------------------------|--------------------------------|-----------------------------------------|--------------------------|-------------------------------|--------------------------------------------|-------------------|-------------------------|----------------------------|
| 2020 Sozzi [19]      | 62.6 (26-90)                                  | 29.3 (17-52)                                             | -                             | 23 (6.1)                  | 169 (44.9)                          | -                                     | -                                     | 51 (13.6)                      | 125 (33.2)                              | 77 (20.5)                | 58 (15.4)                     | 51 (13.6)                                  | 108 (28.7)        | 32 (8.5)                | -                          |
| 2019 Ianieri [16]    | -                                             | -                                                        | 99 (90.0)                     | -                         | 37 (33.6)                           | 3 (2.7)                               | 5 (4.5)                               | -                              | 41 (37.3)                               | -                        | 18 (16.4)                     | 12 (10.9)                                  | 30 (27.3)         | -                       | 12 (10.9)                  |
| 2019 Taskin [11]     | 58 (38-80)                                    | 33 (21-49)                                               | 89 (88.1)                     | -                         | -                                   | -                                     | -                                     | -                              | 21 (20.8)                               | 21 (20.8)                | 19 (18.9)                     | 11 (10.9)                                  | 20 (19.8)         | -                       | 12 (11.9)                  |
| 2019 Tortorella [17] | 64.2 ± 10.3                                   | 34.5 ± 8.3                                               | -                             | 88 (26.9)                 | 84 (25.7)                           | 4 (1.2)                               | 38 (11.6)                             | 45 (13.8)                      | 61 (18.7)                               | 78 (23.9)                | 30 (9.2)                      | 51 (15.6)                                  | 46 (14.1)         | 20 (6.1)                | 32 (9.8)                   |
| 2018 Body [15]       | 65.5 (49-91)                                  | 31.0 (18-56)                                             | 108 (90.8)                    | -                         | -                                   | -                                     | 11 (9.2)                              | -                              | -                                       | 25 (21.0)                | 17 (14.3)                     | 18 (15.1)                                  | 38 (31.9)         | -                       | -                          |
| 2016 Eriksson [14]   | 62 (30-90)                                    | 30.6 (17.7–65.3)                                         | -                             | -                         | -                                   | -                                     | -                                     | -                              | -                                       | -                        | -                             | 55 (17.6)                                  | -                 | -                       | -                          |
| <b>Total</b>         | -                                             | -                                                        | <b>296 (89.7)</b>             | <b>111 (15.8)</b>         | <b>290 (35.7)</b>                   | <b>7 (1.6)</b>                        | <b>54 (12.1)</b>                      | <b>96 (13.7)</b>               | <b>248 (27.1)</b>                       | <b>201 (21.8)</b>        | <b>142 (13.7)</b>             | <b>198 (14.7)</b>                          | <b>242 (23.4)</b> | <b>52 (7.4)</b>         | <b>56 (10.4)</b>           |

-: not available; **BMI**: body mass index; **FIGO**: International Federation of Gynecology and Obstetrics; **LVSI**: lymphovascular space invasion; **LN**: lymph node
