# Supplementary material
Source: HighWire-hosted journal article supplement (https://ijgc.bmj.com/content/33/6/853)
Supplement: inline-supplementary-material-6 [file inline-supplementary-material-6.pdf]

|                 | Aim | Consecutive patients | Prospective data collection | Endpoints appropriate to the aim of the study | Unbiased assessment of endpoints |
|-----------------|-----|----------------------|-----------------------------|-----------------------------------------------|----------------------------------|
| 2016 Eriksson   | +   | +                    | +                           | ?                                             | +                                |
| 2018 Body       | +   | +                    | +                           | +                                             | ?                                |
| 2019 Ianieri    | +   | ?                    | +                           | +                                             | +                                |
| 2019 Taskin     | +   | ?                    | +                           | +                                             | ?                                |
| 2019 Tortorella | +   | +                    | +                           | +                                             | ?                                |
| 2020 Sozzi      | +   | +                    | +                           | +                                             | ?                                |
